# Supplementary material for: Maintenance of the functional integrity of mouse hematopoiesis by EED and promotion of leukemogenesis by EED haploinsufficiency
Source: PubMed Central journal article supplement (PMC4949429; doi:10.1038/srep29454), 2016-07-19
Supplement: srep29454-s1.pdf [file srep29454-s1.pdf]

## **Supplementary Information**

### **Maintenance of the functional integrity of mouse hematopoiesis by EED and promotion of leukemogenesis by EED haploinsufficiency**

Kenichiro Ikeda, Takeshi Ueda, Norimasa Yamasaki, Yuichiro Nakata, Yasuyuki Sera, Akiko Nagamachi, Takahiko Miyama, Hiroshi Kobayashi, Keiyo Takubo, Akinori Kanai, Hideaki Oda, Linda Wolff, Zen-ichiro Honda, Tatsuo Ichinohe, Akio Matsubara, Toshio Suda, Toshiya Inaba, and Hiroaki Honda

Supplementary Table 1. Characteristics of *Eed*<sup>+/ $\Delta$</sup> +MOL4070A leukemic mice

| Mouse No. *    | Age at disease (month) | PB parameters            |           |                          | Macroscopic <sup>†</sup> tumor sites | Surface markers                                                 | Gene rearrangements <sup>§</sup> |                              | Diagnosis |
|----------------|------------------------|--------------------------|-----------|--------------------------|--------------------------------------|-----------------------------------------------------------------|----------------------------------|------------------------------|-----------|
|                |                        | WBC ( $\times 10^3$ /ml) | Hb (g/dl) | Plt ( $\times 10^4$ /ml) |                                      |                                                                 | <i>IgH</i>                       | <i>TCR<math>\beta</math></i> |           |
| 1              | 7.0                    | 81.0                     | 10.7      | 14.1                     | Spl                                  | Gr1 <sup>+</sup> , Mac1 <sup>+</sup>                            | G/G                              | G/G                          | AML       |
| 2              | 8.3                    | 27.9                     | 13.2      | 17.6                     | Spl, LN                              | Thy1.2 <sup>+</sup><br>(CD4 <sup>+</sup> , CD8 <sup>-</sup> )   | G/G                              | G/R                          | T-ALL     |
| 3 <sup>D</sup> | 8.9                    | 5.0                      | 8.5       | 50.7                     | Spl                                  | N.D.                                                            | G/R                              | G/R                          | T-ALL s/o |
| 4              | 9.6                    | 20.8                     | 11.9      | 30.2                     | Thy                                  | Thy1.2 <sup>+</sup> ,<br>(CD4 <sup>-</sup> , CD8 <sup>+</sup> ) | R/R                              | R/R                          | T-ALL     |
| 5              | 9.6                    | 36.4                     | 12.6      | 11.5                     | Thy, Spl                             | Thy1.2 <sup>+</sup><br>(CD4 <sup>+</sup> , CD8 <sup>+</sup> )   | G/G                              | R/R                          | T-ALL     |
| 6              | 9.6                    | 25.4                     | 11.4      | 21.8                     | Spl                                  | Gr1 <sup>+</sup> , Mac1 <sup>+</sup>                            | G/G                              | G/G                          | AML       |
| 7              | 10.5                   | 11.7                     | 15.7      | 38.7                     | Thy, Spl                             | Thy1.2 <sup>+</sup><br>(CD4 <sup>+</sup> , CD8 <sup>+</sup> )   | G/R                              | G/R                          | T-ALL     |
| 8              | 10.5                   | 7.6                      | 11.0      | 51.0                     | Spl                                  | Gr1 <sup>+</sup> , Mac1 <sup>+</sup>                            | G/R                              | G/G                          | AML       |

\* D, found dead

<sup>†</sup> Thy, thymus; Spl, spleen; LN, lymph node

<sup>§</sup> G, germline; R, rearran

Supplementary Table 1. Ikeda K. *et al.*

Supplementary Table 2. Retrovirus integration sites identified by iPCR

| Mouse No.                                           | Mouse gene   | Chromosomal No.  | Integration site  | Gene description                                                                                                        |                                                                                   |
|-----------------------------------------------------|--------------|------------------|-------------------|-------------------------------------------------------------------------------------------------------------------------|-----------------------------------------------------------------------------------|
| 1                                                   | Dedd2        | chr7(qA3)        | 5' up 20kb        | death effector domain-containing DNA binding protein 2                                                                  |                                                                                   |
|                                                     | Pak2         | chr16(qB2)       | 1st intron        | p21 protein (Cdc42/Rac)-activated kinase 2                                                                              |                                                                                   |
|                                                     | Dedd2        | chr7(qA3)        | 5' up 20kb        | death effector domain-containing DNA binding protein 2                                                                  |                                                                                   |
|                                                     | Nup107       | chr10(qD2)       | 26th intron       | nucleoporin 107                                                                                                         |                                                                                   |
|                                                     | <b>*Lmo2</b> | <b>chr2(qE2)</b> | <b>5' up 20kb</b> | <b>LIM domain only 2, transcript variant 1</b>                                                                          |                                                                                   |
|                                                     | Gng7         | chr10(qC1)       | 2nd intron        | guanine nucleotide binding protein (G protein), gamma 7, transcript variant 1                                           |                                                                                   |
|                                                     | Klf13        | chr7(qA3)        | 3' down 20kb      | death effector domain-containing DNA binding protein 2                                                                  |                                                                                   |
|                                                     | Lrp5         | chr7(qC)         | 5' up 25kb        | Kruppel-like factor 13                                                                                                  |                                                                                   |
|                                                     | Cacnb3       | chr18(qE)        | 1st intron        | low density lipoprotein receptor-related protein 5                                                                      |                                                                                   |
|                                                     | Atp6v0c      | chr6(qB1)        | 5' up 100kb       | ATPase, H+ transporting, lysosomal V0 subunit C                                                                         |                                                                                   |
|                                                     | Poli         | chr18(qE2)       | 5' up 100kb       | polymerase (DNA directed), iota, transcript variant 1                                                                   |                                                                                   |
|                                                     | Pald1        | chr10(qB4)       | 1st intron        | phosphatase domain containing, paladin 1                                                                                |                                                                                   |
|                                                     | Kazald1      | chr19(qC3)       | 2nd intron        | Kazal-type serine peptidase inhibitor domain 1                                                                          |                                                                                   |
|                                                     | Ly8c2        | chr15(qD3)       | 5' up 3kb         | lymphocyte antigen 6 complex, locus C2                                                                                  |                                                                                   |
|                                                     | C1galt1c1    | chrX(qA3.3)      | 5' up 10kb        | C1GALT1-specific chaperone 1 (C1galt1c1)                                                                                |                                                                                   |
|                                                     | Gfi1         | chr5(qF)         | 5' up 7kb         | growth factor independent 1 (Gfi1), transcript variant                                                                  |                                                                                   |
|                                                     | Pklr         | chr3(qF1)        | 5' up 2kb         | pyruvate kinase liver and red blood cell (Pklr), nuclear gene encoding mitochondrial protein, transcript variant 1      |                                                                                   |
| 2                                                   | Snx5         | chr2(qG1)        | 3' dpwn 3kb       | sorting nexin 5 (Snx5), transcript variant 2                                                                            |                                                                                   |
|                                                     | <b>*Fli1</b> | <b>chr9(qA4)</b> | <b>1st intron</b> | <b>Friend leukemia integration 1 (Fli1)</b>                                                                             |                                                                                   |
|                                                     | Psen2        | chr1(qH4)        | 1st intron        | presenilin 2 (Psen2), transcript variant 2                                                                              |                                                                                   |
|                                                     | B9d2         | chr7(qA3)        | 1st intron        | B9 protein domain 2 (B9d2)                                                                                              |                                                                                   |
|                                                     | Psen2        | chr1(qH4)        | 1st intron        | presenilin 2 (Psen2), transcript variant 2                                                                              |                                                                                   |
|                                                     | Alcam        | chr16(qB5)       | 5' up 10kb        | activated leukocyte cell adhesion molecule (Alcam)                                                                      |                                                                                   |
|                                                     | Pigr         | chr1(qE4)        | 7th intron        | polymeric immunoglobulin receptor (Pigr)                                                                                |                                                                                   |
|                                                     | Srr          | chr11(qB5)       | 1st intron        | serine racemase (Srr), transcript variant 1                                                                             |                                                                                   |
|                                                     | Sgk1         | chr19(qA3)       | 3rd intron        | serum/glucocorticoid regulated kinase 1 (Sgk1), transcript variant 1                                                    |                                                                                   |
|                                                     | Fzd9         | chr5(qG2)        | 5' up 10kb        | fizzled homolog 9 (Drosophila) (Fzd9)                                                                                   |                                                                                   |
|                                                     | Ttl10        | chr4(qE2)        | 5' up 10kb        | tubulin tyrosine ligase-like family, member 10 (Ttl10)                                                                  |                                                                                   |
|                                                     | Dapp1        | chr3(qG3)        | 3rd intron        | dual adaptor for phosphotyrosine and 3-phosphoinositides 1 (Dapp1)                                                      |                                                                                   |
|                                                     | Pigr         | chr1(qE4)        | 8th intron        | polymeric immunoglobulin receptor (Pigr)                                                                                |                                                                                   |
|                                                     | B9d2         | chr7(qA3)        | 1st intron        | B9 protein domain 2 (B9d2)                                                                                              |                                                                                   |
|                                                     | 3            | Snx29            | chr16(qA1)        | 13th intron                                                                                                             | sorting nexin 29 (Snx29)                                                          |
|                                                     |              | Ssh2             | chr11(qB5)        | 2nd intron                                                                                                              | slingshot homolog 2 (Drosophila)                                                  |
|                                                     |              | Cyhr1            | chr15(qD3)        | 2nd intron                                                                                                              | cysteine and histidine rich 1 (Cyhr1), transcript variant 1                       |
| P2rx4                                               |              | chr5(qF)         | 5' up 5kb         | purinergic receptor P2X, ligand-gated ion channel 4                                                                     |                                                                                   |
| Msh6                                                |              | chr17(qE4)       | 5' up 500bp       | mutS homolog 6 (E. coli) (Msh6)                                                                                         |                                                                                   |
| Pitpnm2                                             |              | chr5(qF)         | 1st intron        | phosphatidylinositol transfer protein, membrane-associated 2 (Pitpnm2)                                                  |                                                                                   |
| Ndst4                                               |              | chr3(qG1)        | 5' up 100kb       | N-deacetylase/N-sulfotransferase (heparin glucosaminyl) 4 (Ndst4)                                                       |                                                                                   |
| <b>*Lmo2</b>                                        |              | <b>chr2(qE2)</b> | <b>5' up 10kb</b> | <b>LIM domain only 2 (Lmo2), transcript variant 4</b>                                                                   |                                                                                   |
| Tsc22d1                                             |              | chr14(qD3)       | 1st intron        | TSC22 domain family, member 1 (Tsc22d1), transcript variant 1                                                           |                                                                                   |
| Ubxn11                                              |              | chr4(qD3)        | 8th intron        | UBX domain protein 11 (Ubxn11), transcript variant 1                                                                    |                                                                                   |
| Gm9054                                              |              | chr3(qF2.1)      | 5' up 1kb         | predicted gene 9054 (Gm9054), non-coding RNA                                                                            |                                                                                   |
| Stat5a                                              |              | chr11(qD)        | 5' up 1kb         | signal transducer and activator of transcription 5A (Stat5a), transcript variant 1                                      |                                                                                   |
| Trp53i11                                            |              | chr2(qE1)        | 1st intron        | transformation related protein 53 inducible protein 11 (Trp53i11)                                                       |                                                                                   |
| Krcc                                                |              | chr11(qB1.2)     | 5' up 500bp       | lysine-rich coiled-coil 1 (Krcc1)                                                                                       |                                                                                   |
| Tgtp1                                               |              | chr6(qC1)        | 5' up 1kb         | T cell specific GTP 1 (Tgtp1)                                                                                           |                                                                                   |
| 4                                                   |              | Gse1             | chr8(qE1)         | 5' up 50kb                                                                                                              | genetic suppressor element 1 (Gse1), transcript variant 1                         |
|                                                     |              | Exoc6            | chr19(qC2)        | 5' up 50kb                                                                                                              | exocyst complex component 6 (Exoc6)                                               |
|                                                     | Gse1         | chr8(qE1)        | 5' up 50kb        | genetic suppressor element 1 (Gse1), transcript variant 1                                                               |                                                                                   |
|                                                     | AK018976     | chr19(qC2)       | 3' down 20kb      | adult male testis cDNA, RIKEN                                                                                           |                                                                                   |
|                                                     | Tmen173      | chr18(qB2)       | 5' up 10kb        | transmembrane protein 173 (Tmen173)                                                                                     |                                                                                   |
|                                                     | Ankrd46      | chr15(qB3.1)     | 3' down 25kb      | ankyrin repeat domain 46 (Ankrd46)                                                                                      |                                                                                   |
|                                                     | Tom1l2       | chr11(qB2)       | 9th intron        | target of myb 1-like 2 (chicken) (Tom1l2), transcript variant 2                                                         |                                                                                   |
|                                                     | Selp1g       | chr5(qF)         | 5' up 2kb         | selectin, platelet (p-selectin) ligand (Selp1g)                                                                         |                                                                                   |
|                                                     | Ankrd6       | chr4(qA5)        | 2nd intron        | ankyrin repeat domain 6 (Ankrd6), transcript variant 3                                                                  |                                                                                   |
|                                                     | Exoc6        | chr19(qC2)       | 5' up 50kb        | exocyst complex component 6 (Exoc6)                                                                                     |                                                                                   |
|                                                     | Kiss1r       | chr10(qC1)       | 5th exon          | KISS 1 receptor (KISS1r)                                                                                                |                                                                                   |
|                                                     | Shf          | chr2(qE5)        | 2nd intron        | Src homology 2 domain containing F (Shf)                                                                                |                                                                                   |
|                                                     | Pcyt1a       | chr16(qB3)       | 1st exon          | phosphate cytidylyltransferase 1, choline, alpha isoform (Pcyt1a), transcript variant 3                                 |                                                                                   |
|                                                     | B3gnt11      | chr11(qE2)       | 5' up 15kb        | UDP-GlcNAc:betaGal beta-1, 3-N-acetylglucosaminyltransferase-like 1 (B3gnt11)                                           |                                                                                   |
|                                                     | Itgb2        | chr19(qC1)       | 5' up 14kb        | integrin beta 2 (Itgb2)                                                                                                 |                                                                                   |
|                                                     | 5            | <b>*Lmo2</b>     | <b>chr2(qE2)</b>  | <b>5' up 20kb</b>                                                                                                       | <b>LIM domain only 2 (Lmo2), transcript variant 4</b>                             |
|                                                     |              | Sema7a           | chr9(qB)          | 1st intron                                                                                                              | sema domain, immunoglobulin domain (Ig), and GPI membrane anchor, (semaphorin) 7A |
| Sdk1                                                |              | chr5(qG2)        | 20th intron       | sidekick homolog 1 (chicken) (Sdk1)                                                                                     |                                                                                   |
| Parvb                                               |              | chr15(qE2)       | 13th intron       | parvin, beta (Parvb)                                                                                                    |                                                                                   |
| Rab37                                               |              | chr11(qE2)       | 2nd intron        | RAB37, member of RAS oncogene family (Rab37), transcript variant 1                                                      |                                                                                   |
| Lrrc25                                              |              | chr8(qB3.3)      | 2nd exon          | leucine rich repeat containing 25 (Lrrc25)                                                                              |                                                                                   |
| Metrn1                                              |              | chr15(qE2)       | 5' up 13kb        | meteorin, glial cell differentiation regulator-like (Metrn1)                                                            |                                                                                   |
| B3gnt11                                             |              | chr11(qE2)       | 5' up 18kb        | UDP-GlcNAc:betaGal beta-1, 3-N-acetylglucosaminyltransferase-like 1 (B3gnt11)                                           |                                                                                   |
| Gabpb2                                              |              | chr3(qF2.1)      | 1st exon          | GA repeat binding protein, beta 2 (Gabpb2), transcript variant 1                                                        |                                                                                   |
| Spry1                                               |              | chr3(qB)         | 3' down 10kb      | sprouty homolog 1 (Drosophila) (Spry1)                                                                                  |                                                                                   |
| Zfp36                                               |              | chr7(qB1)        | 5' up 1.5kb       | Zinc finger protein 36                                                                                                  |                                                                                   |
| Klhl35                                              |              | chr7(qE1)        | 2nd intron        | kelch-like 35 (Drosophila) (Klhl35)                                                                                     |                                                                                   |
| Fam71e1                                             |              | chr7(qB3)        | 2nd intron        | family with sequence similarity 71, member E1 (Fam71e1)                                                                 |                                                                                   |
| Il2ra                                               |              | chr2(qA1)        | 5' up 5kb         | interleukin 2 receptor, alpha chain (Il2ra)                                                                             |                                                                                   |
| <b>*Mecom</b>                                       |              | <b>chr3(qA3)</b> | <b>2nd intron</b> | <b>MDS1 and EVI1 complex locus (Mecom), transcript variant 1</b>                                                        |                                                                                   |
| 6                                                   |              | Acot7            | chr4(qE2)         | 1st intron                                                                                                              | acyl-CoA thioesterase 7 (Acot7), transcript variant 1                             |
|                                                     |              | Map3k8           | chr18(qA1)        | 3' down 25kb                                                                                                            | mitogen-activated protein kinase kinase kinase 8 (Map3k8)                         |
|                                                     | Tmen108      | chr9(qF1)        | 2nd intron        | transmembrane protein 108 (Tmen108)                                                                                     |                                                                                   |
|                                                     | Phtf2        | chr5(qA3)        | 1st intron        | putative homeodomain transcription factor 2 (Phtf2)                                                                     |                                                                                   |
|                                                     | Asgr         | chr11(qB3)       | 2nd intron        | asialoglycoprotein receptor 2 (Asgr2)                                                                                   |                                                                                   |
|                                                     | Oaz1         | chr10(qC1)       | 5' up 1.5kb       | ornithine decarboxylase antizyme 1 (Oaz1)                                                                               |                                                                                   |
|                                                     | Ywhaz        | chr15(qB3)       | 3' down 40kb      | tyrosine 3-monooxygenase-/tryptophan 5-monooxygenase activation protein, zeta polypeptide (Ywhaz), transcript variant 1 |                                                                                   |
|                                                     | Lrrc58       | chr16(qB3)       | 5' up 800bp       | leucine rich repeat containing 58 (Lrrc58)                                                                              |                                                                                   |
|                                                     | Csnk1e       | chr15(qE1)       | 2nd intron        | casein kinase 1, epsilon (Csnk1e)                                                                                       |                                                                                   |
|                                                     | Ncam1        | chr9(qA5.3)      | 5' up 100kb       | neural cell adhesion molecule 1 (Ncam1), transcript variant 3                                                           |                                                                                   |
|                                                     | My10         | chr5(qG2)        | 5' up 500bp       | myosin, light chain 10, regulatory (My10), transcript variant                                                           |                                                                                   |
|                                                     | Slc11a1      | chr1(qC3)        | 5th exon          | solute carrier family 11 (proton-coupled divalent metal ion transporters), member 1 (Slc11a1)                           |                                                                                   |
|                                                     | Lipc         | chr9(qD)         | 1st intron        | lipase, hepatic (Lipc)                                                                                                  |                                                                                   |
|                                                     | Dnmt3b       | chr2(qH1)        | 5' up 10kb        | DNA methyltransferase 3B, transcript variant 1                                                                          |                                                                                   |
|                                                     | 7            | Arhgef28         | chr11(qC)         | 3rd exon                                                                                                                | chemokine (C-C motif) ligand 3                                                    |
|                                                     |              | Mrgpra3          | chr9(qD)          | 1st intron                                                                                                              | MAS-related GPR, member A3                                                        |
|                                                     |              | Mapkap1          | chr7(qB4)         | 5' up 170kb                                                                                                             | mitogen-activated protein kinase associated protein 1, transcript variant 1       |
| Wasf3                                               |              | chr10(qA3)       | 3rd intron        | WAS protein family, member 3                                                                                            |                                                                                   |
| Slc35b1                                             |              | chr10(qA3)       | 2nd intron        | solute carrier family 35, member 1                                                                                      |                                                                                   |
| Fam117b                                             |              | chr1(qC2)        | 1st intron        | family with sequence similarity 117, member B                                                                           |                                                                                   |
| Bai1                                                |              | chr1(qC2)        | 1st intron        | brain-specific angiogenesis inhibitor 1                                                                                 |                                                                                   |
| Mroh4                                               |              | chr15(qD3)       | 3' down 10kb      | maestro heat-like repeat family member 4                                                                                |                                                                                   |
| Rbm43                                               |              | chr2(qC1.1)      | 3' down 10kb      | RNA binding motif protein 43, transcript variant 1                                                                      |                                                                                   |
| Irf1                                                |              | chr11(qB1.3)     | 5' up 300bp       | interferon regulatory factor 1, transcript variant 1                                                                    |                                                                                   |
| Dapp1                                               |              | chr3(qG3)        | 5' up 8kb         | dual adaptor for phosphotyrosine and 3-phosphoinositides 1                                                              |                                                                                   |
| Csf1r                                               |              | chr18(qE1)       | 5' up 8kb         | colony stimulating factor 1 receptor                                                                                    |                                                                                   |
| <b>*Leukemia-associated genes subjected to qPCR</b> |              |                  |                   |                                                                                                                         |                                                                                   |

**Supplementary Table 3. Characteristics of leukemias in *Eed*<sup>+/ $\Delta$</sup> +*Evi1-IRES-EGFP* mice**

| Mouse No. | Age after BMT (days) | PB parameters                     |           |                                   | Macroscopic tumor sites * | Surface markers                      | Diagnosis |
|-----------|----------------------|-----------------------------------|-----------|-----------------------------------|---------------------------|--------------------------------------|-----------|
|           |                      | WBC ( $\times 10^3/\mu\text{l}$ ) | Hb (g/dl) | Plt ( $\times 10^4/\mu\text{l}$ ) |                           |                                      |           |
| 1         | 23                   | 1.9                               | 5.4       | 46.8                              | Spl                       | Gr1 <sup>+</sup> , Mac1 <sup>+</sup> | AML       |
| 2         | 43                   | 42.5                              | 8.0       | 13.4                              | Spl                       | Gr1 <sup>+</sup> , Mac1 <sup>+</sup> | AML       |
| 3         | 106                  | 36.6                              | 13.7      | 19.4                              | Spl                       | Gr1 <sup>+</sup> , Mac1 <sup>+</sup> | AML       |
| 4         | 106                  | 49.4                              | 12.4      | 10.7                              | Spl                       | Gr1 <sup>+</sup> , Mac1 <sup>+</sup> | AML       |

\* Spl, spleen

**Supplementary Table 4. Surface markers to separate HSPC fractions**

| <b>Fraction</b> | <b>Surface markers</b>                                                                                   |
|-----------------|----------------------------------------------------------------------------------------------------------|
| LSK             | c-kit <sup>+</sup> , Sca-1 <sup>+</sup> , Lin <sup>-</sup>                                               |
| LT-HSC          | c-kit <sup>+</sup> , Sca-1 <sup>+</sup> , Lin <sup>-</sup> , CD34 <sup>-</sup> , CD135 <sup>-</sup>      |
| ST-HSC          | c-kit <sup>+</sup> , Sca-1 <sup>+</sup> , Lin <sup>-</sup> , CD34 <sup>+</sup> , CD135 <sup>-</sup>      |
| MPP             | c-kit <sup>+</sup> , Sca-1 <sup>+</sup> , Lin <sup>-</sup> , CD34 <sup>+</sup> , CD135 <sup>+</sup>      |
| CMP             | c-kit <sup>+</sup> , Sca-1 <sup>+</sup> , Lin <sup>-</sup> , CD34 <sup>+</sup> , CD16/32 <sup>low</sup>  |
| GMP             | c-kit <sup>+</sup> , Sca-1 <sup>+</sup> , Lin <sup>-</sup> , CD34 <sup>+</sup> , CD16/32 <sup>high</sup> |
| MEP             | c-kit <sup>+</sup> , Sca-1 <sup>+</sup> , Lin <sup>-</sup> , CD34 <sup>-</sup> , CD16/32 <sup>-</sup>    |

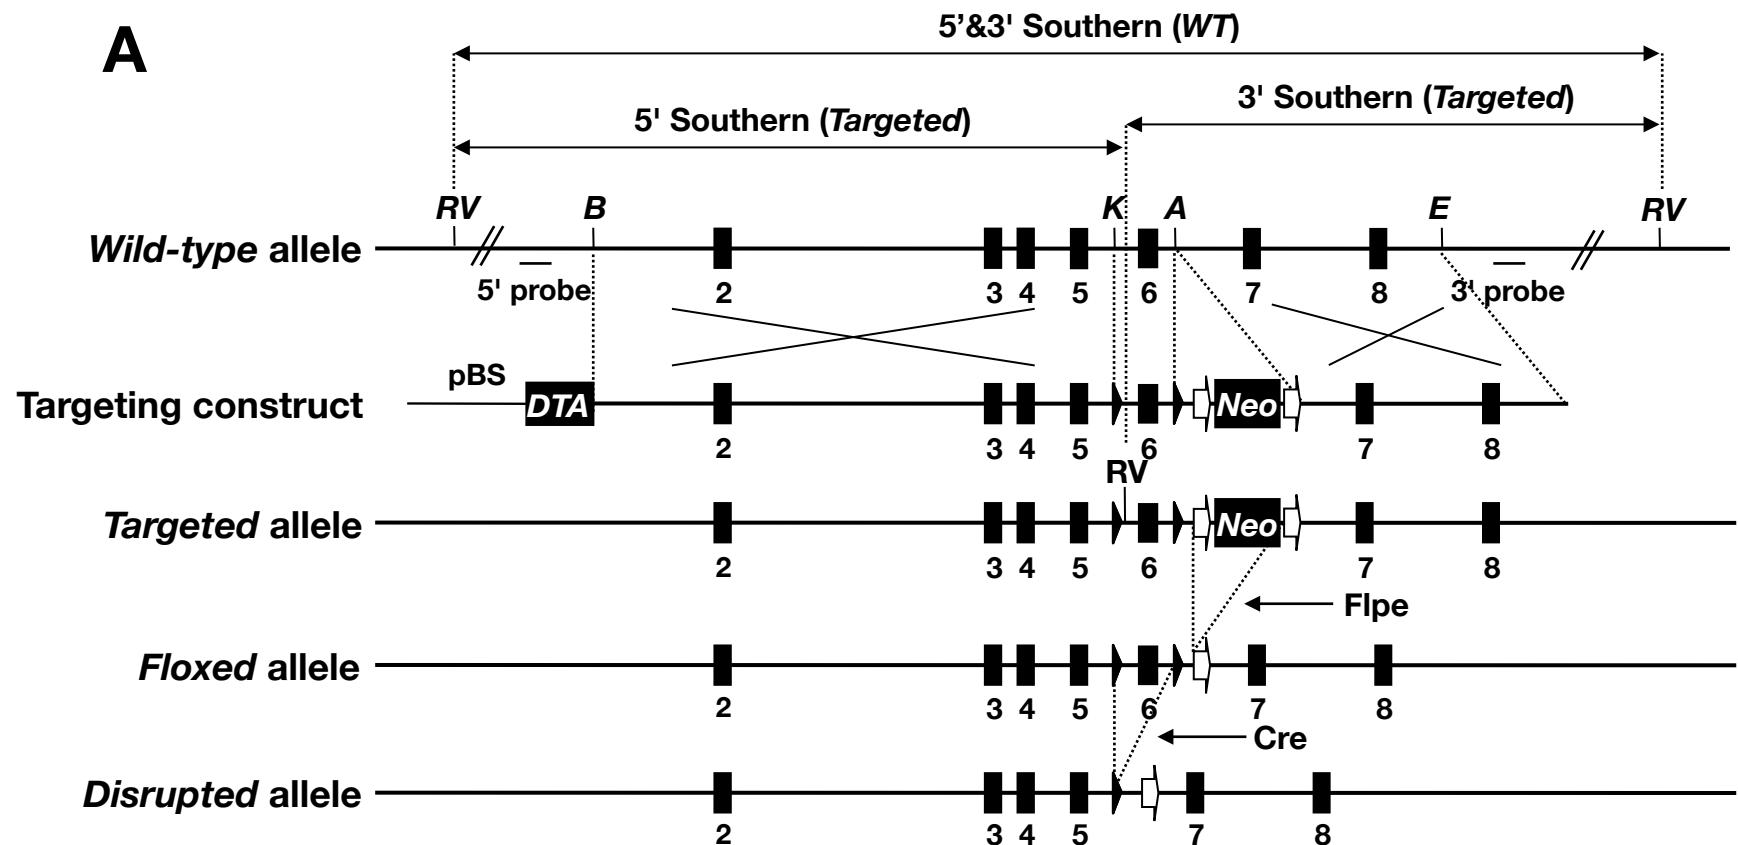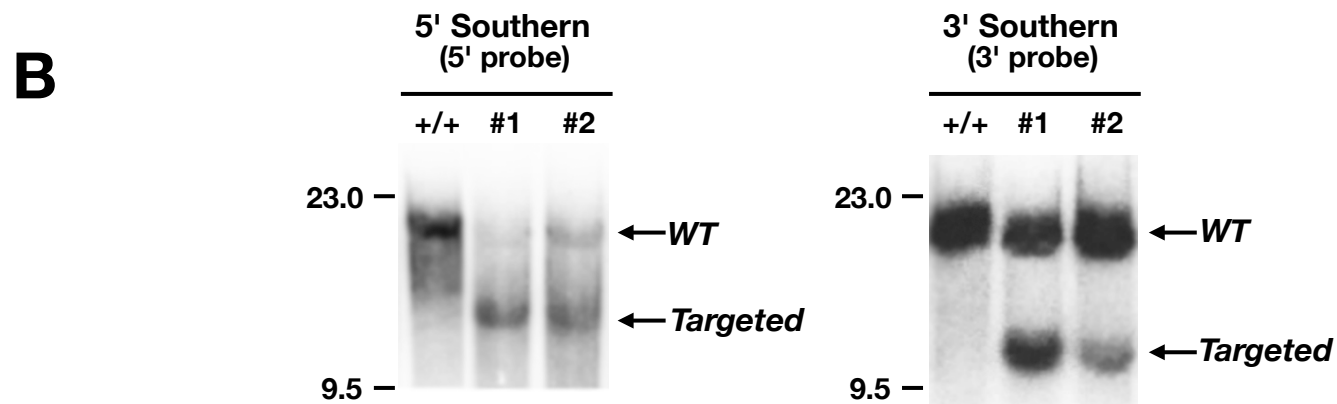

Supplementary Figure 1. Ikeda K. *et al.*

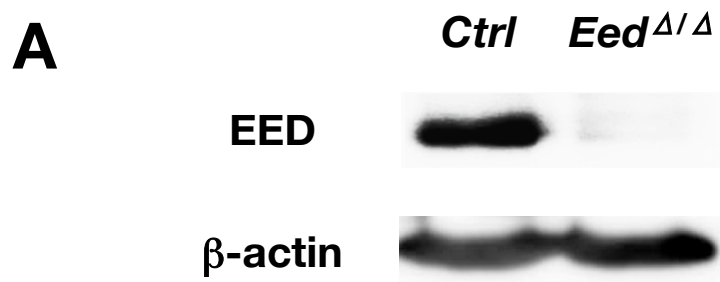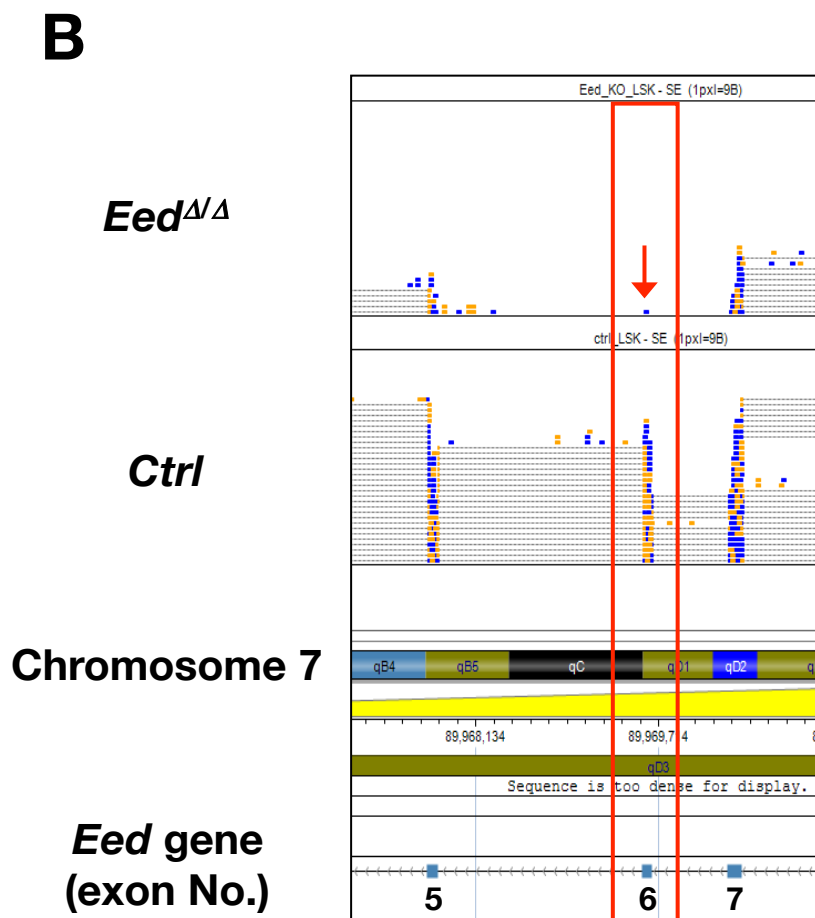

Supplementary Figure 2. Ikeda K. *et al.*

## BM

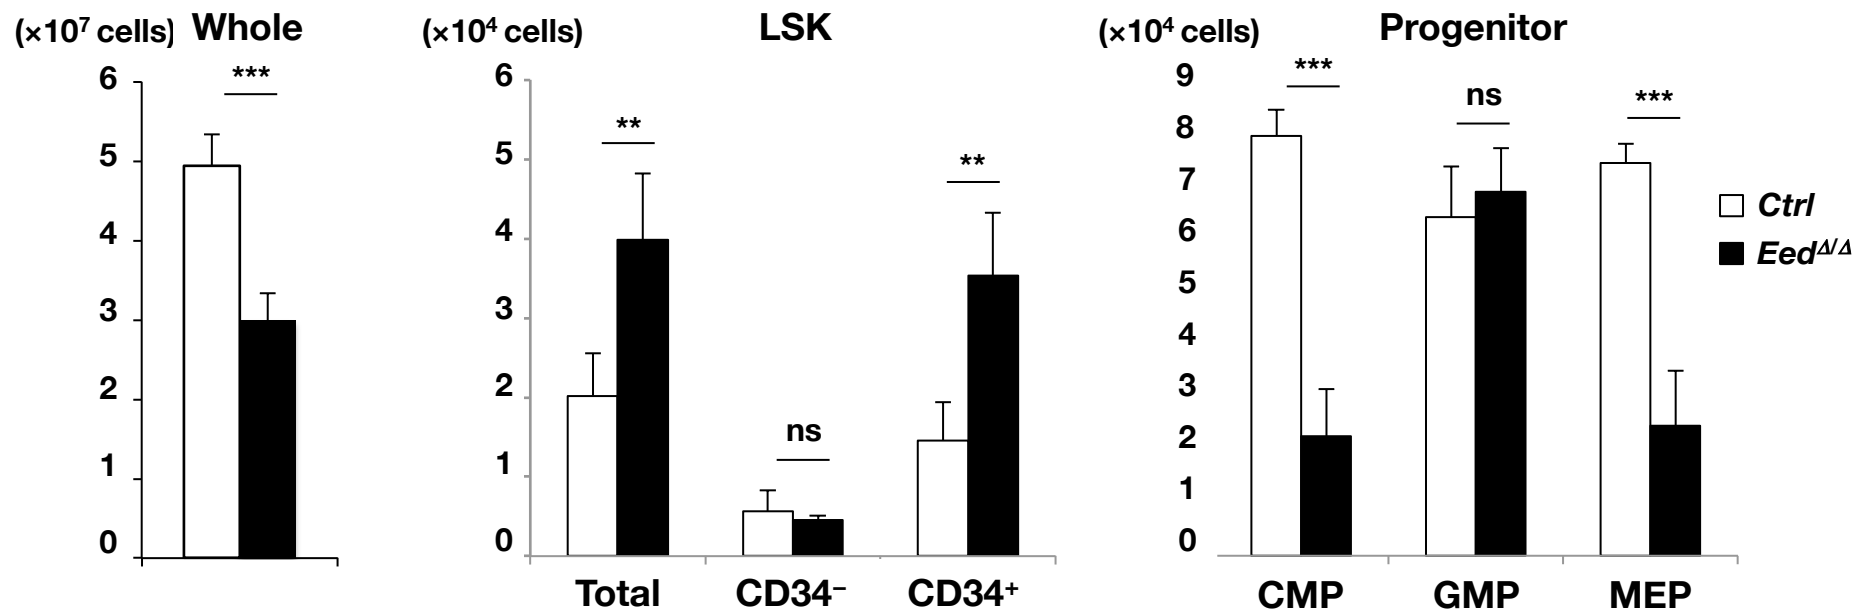

Supplementary Figure 3. Ikeda K. *et al.*



**LSK cells**  
(cutoff relative to *control* cells)

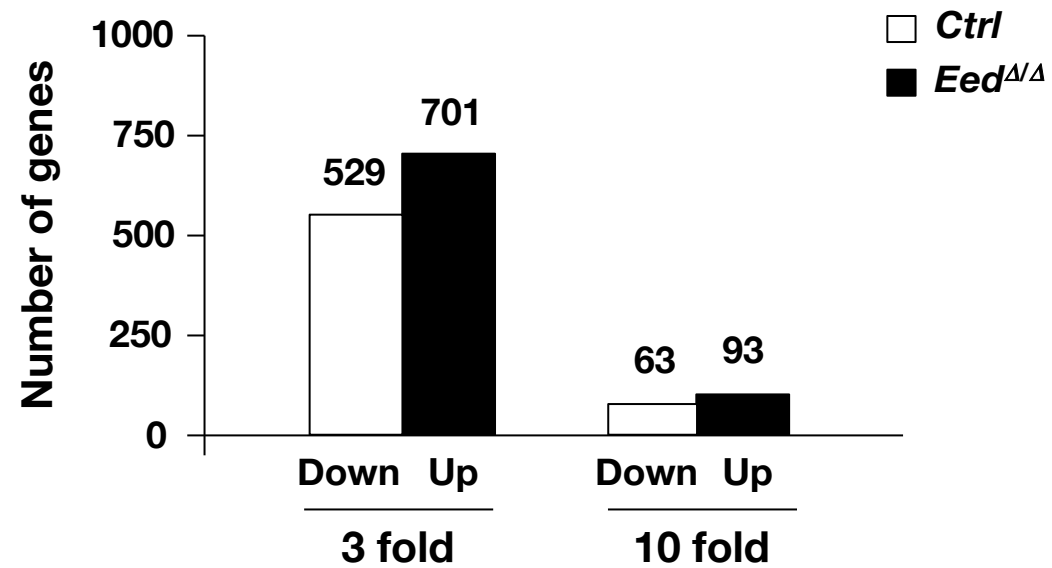

Supplementary Figure 4. Ikeda K. *et al.*

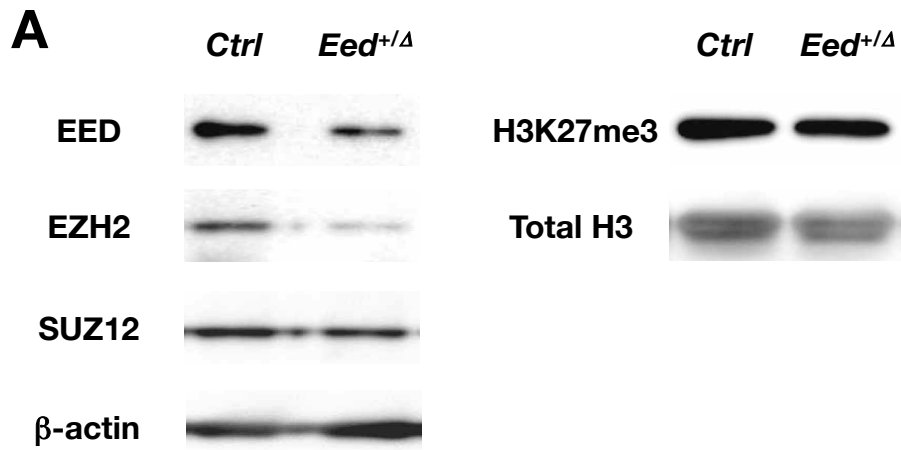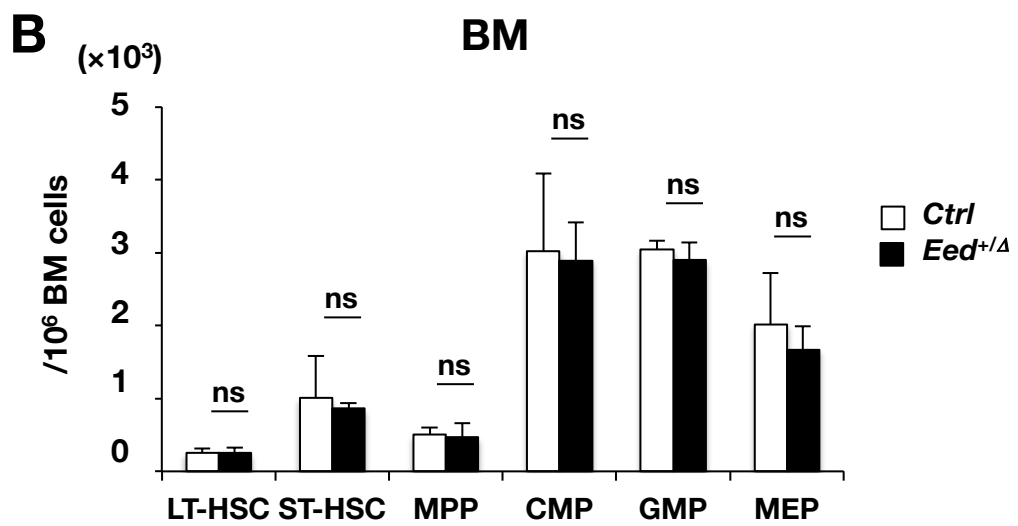

Supplementary Figure 5. Ikeda K. *et al.*

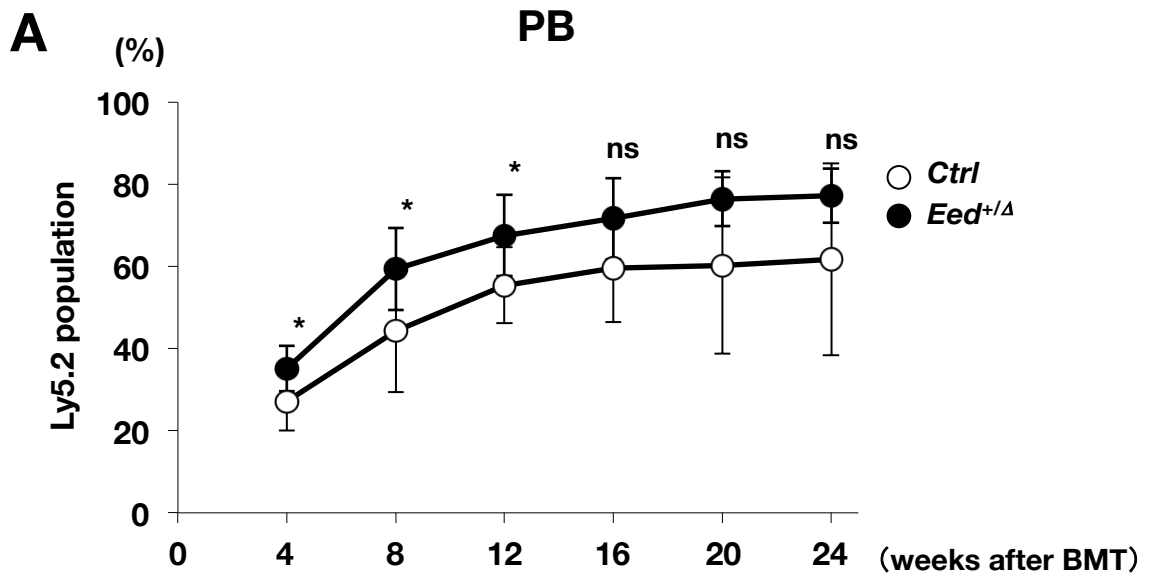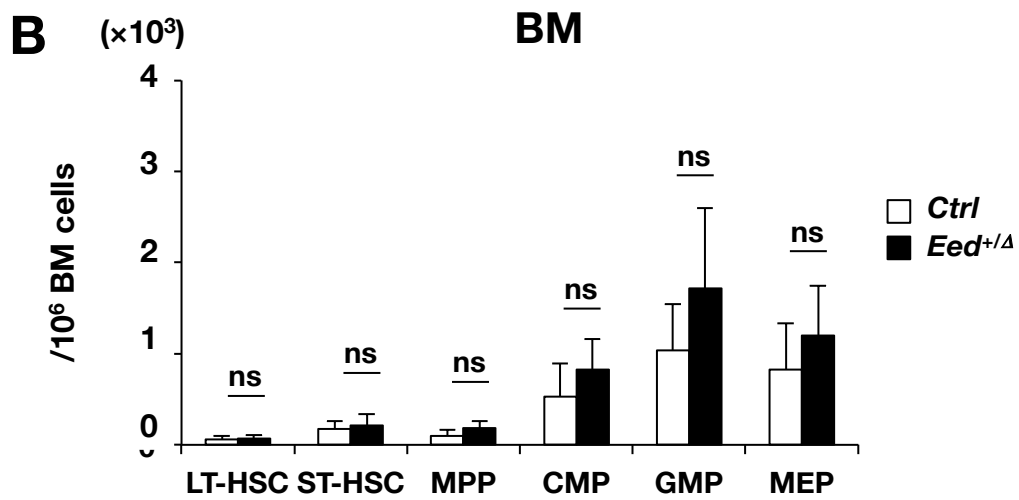

Supplementary Figure 6. Ikeda K. *et al.*

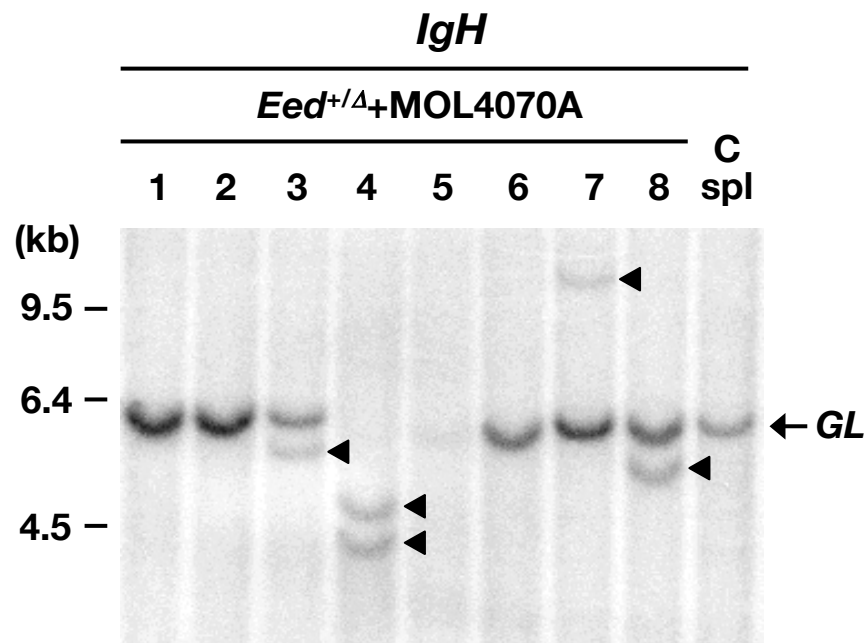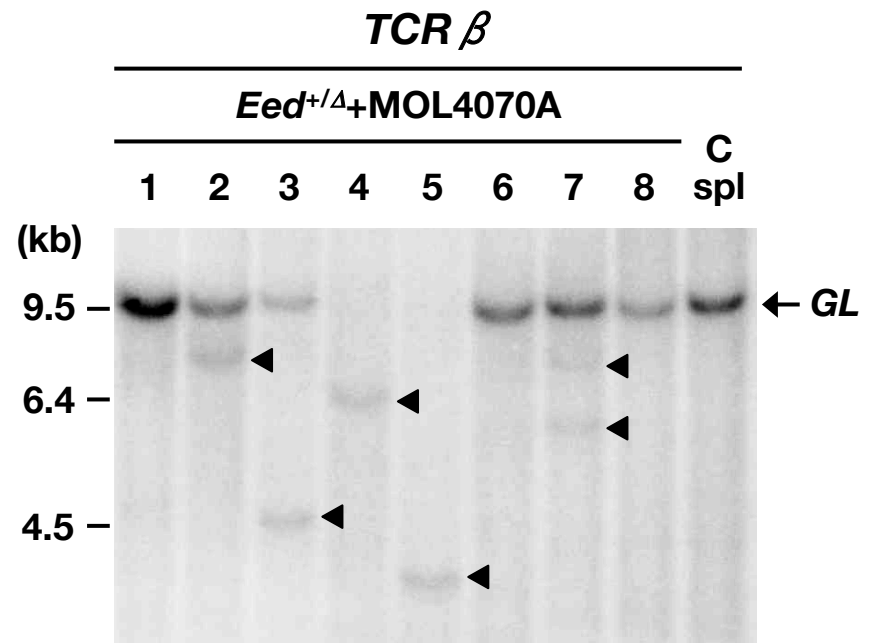

Supplementary Figure 7. Ikeda K. *et al.*

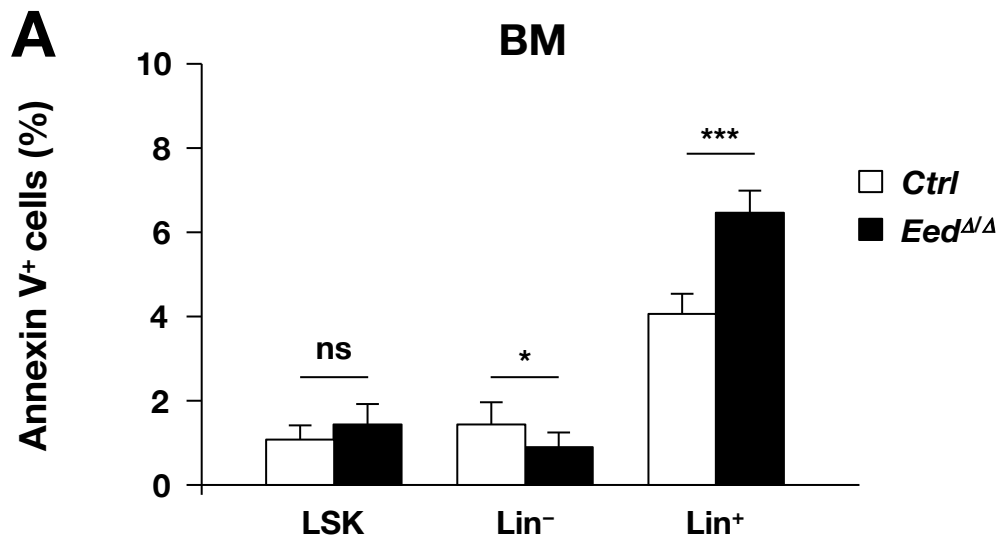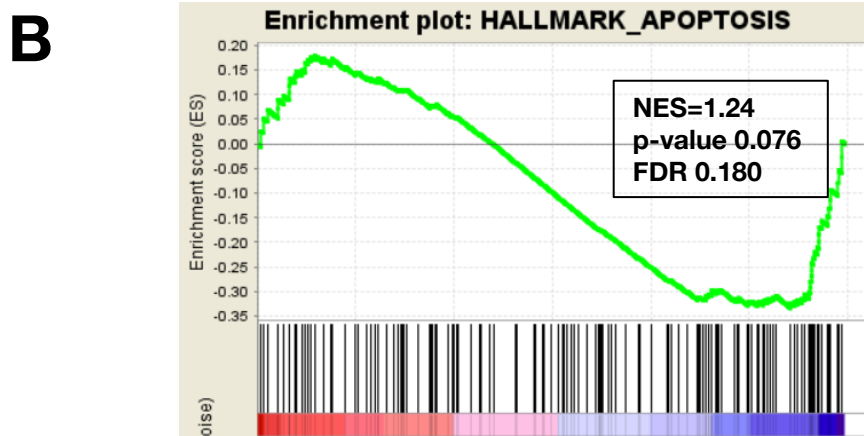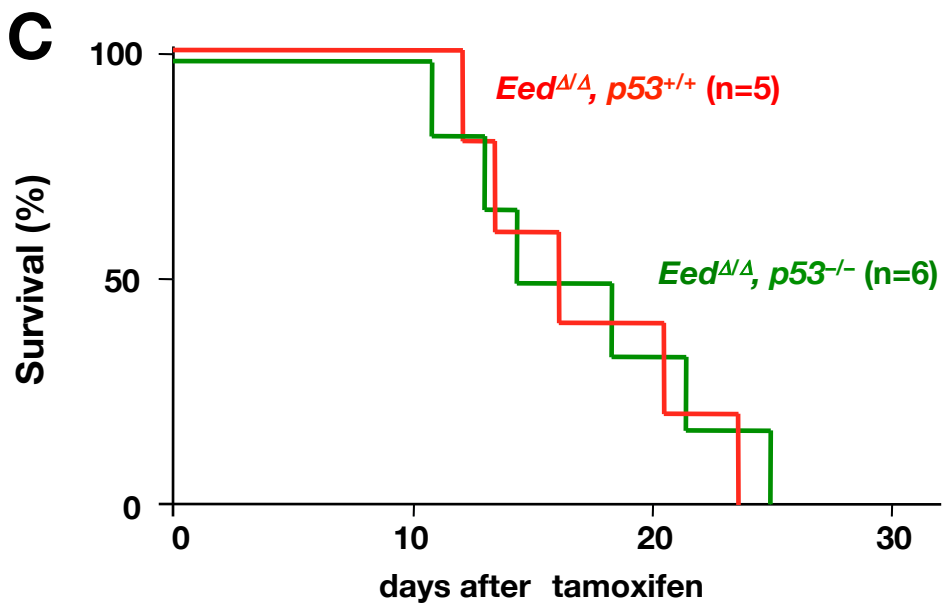

Supplementary Figure 8. Ikeda K. *et al.*

## Legends of Supplementary Figures

**Supplementary Figure 1. Targeting strategy and genotyping of ES clones.** (A) Exon 6 of mouse *Eed* was encompassed by two *loxP* sites (black triangles), and a *Neo-resistance* gene (*Neo*) was flanked by two *Frt* sites (white arrows). After removing *Neo* using Flpe, exon 6 was deleted by Cre. The positions of genomic 5' and 3' probes during Southern blot analysis are shown. The restriction sites are *RV*, *EcoRV*; *B*, *BamHI*; *K*, *KpnI*; *A*, *ApaI*; and *E*, *EcoRI*. (B) Homologously recombined embryonic stem cell clones (#1 and #2) identified via Southern blotting. *Wild-type* (*WT*) and *targeted* bands are indicated by arrows.

**Supplementary Figure 2. Absence of EED protein and *Eed* exon 6-derived transcript in *Eed*<sup>Δ/Δ</sup> hematopoietic cells.** (A) Western blot of EED in the BM cells of *control* and *Eed*<sup>Δ/Δ</sup> mice. (B) Accumulation of transcripts derived from *Eed* exons of *Eed*<sup>Δ/Δ</sup> and *control* LSK cells. *Eed* exon 6-derived transcripts are boxed and those of *Eed*<sup>Δ/Δ</sup> LSK cells are indicated by an arrow.

**Supplementary Figure 3. Analysis of *Eed*<sup>Δ/Δ</sup> HSPCs at 2 days after tamoxifen administration.** (A) Cell numbers of whole and LSK (total, CD34<sup>-</sup>, and CD34<sup>+</sup>) and progenitor (CMP, GMP, and MEP) fractions in the BM of *control* and *Eed*<sup>Δ/Δ</sup> mice at 2 days after tamoxifen administration. ns; not significant, \*\*;  $p < 0.01$ , \*\*\*;  $p < 0.001$ .

**Supplementary Figure 4. Analysis of RNA expression data of *Eed*<sup>Δ/Δ</sup> LSK cells.** Numbers of genes downregulated and upregulated in *Eed*<sup>Δ/Δ</sup> LSK cells compared with control cells. Results of 3-fold and 10-fold cutoffs are shown.

**Supplementary Figure 5. Hematopoietic analysis of *Eed*<sup>+/Δ</sup> mice.** (A) Western blot of EED and other PRC2 components, EZH2, and SUZ12 (left panels), and of

H3K27me3–me1 (right panels) in the spleens of *control* and *Eed<sup>+/-</sup>* mice. (B) Analysis of HSPCs in the BM of *control* and *Eed<sup>+/-</sup>* mice. ns; not significant.

**Supplementary Figure 6. BMT analysis of *Eed<sup>+/-</sup>* HSPCs.** (A) Percentages of donor (*Ctrl* or *Eed<sup>+/-</sup>*)-derived cells in the peripheral blood of recipient mice. ns; not significant, \*,  $p < 0.05$ . (B) Number of donor (*Ctrl* or *Eed<sup>+/-</sup>*)-derived HSPCs in the BM of recipient mice. ns; not significant.

**Supplementary Figure 7. Analysis of gene rearrangements in tumors developed in *Eed<sup>+/-</sup>* + MOL4070A mice.** DNAs extracted from tumor tissues from *Eed<sup>+/-</sup>* + MOL4070A mice and a control spleen (C Spl) were digested with *EcoRI* and blotted with an *IgH* (left panel) or a *TCR $\beta$*  probe (right panel). *Germline (GL)* and *rearranged* bands are indicated by arrows and arrowheads, respectively.

**Supplementary Figure 8. Analysis of apoptosis of *Eed<sup>+/-</sup>* HSPCs.** (A) Percentages in Annexin V<sup>+</sup> cells in LSK, Lin<sup>-</sup>, and Lin<sup>+</sup> fractions. ns; not significant, \*,  $p < 0.05$ , \*\*\*,  $p < 0.001$ . (B) GSEA analysis for apoptosis related genes. No significant enrichment was detected between *control* and *Eed<sup>+/-</sup>* LSKs. (C) Survival curves of *Eed<sup>+/-</sup>*, *p53<sup>+/+</sup>* and *Eed<sup>+/-</sup>*, *p53<sup>-/-</sup>* mice. ns; not significant.
